# Supplementary material for: Microarray meta-analysis database (M2DB): a uniformly pre-processed, quality controlled, and manually curated human clinical microarray database
Source: Springer Nature journal article supplement (doi:10.1186/1471-2105-11-421), 2010-08-10
Supplement: 12859_2010_3878_MOESM4_ESM.pdf [file 12859_2010_3878_MOESM4_ESM.pdf]

ArrayExpress and GEO  
(EBI) (NCBI)

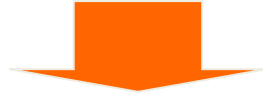

Affymetrix arrays with raw data (CEL file)

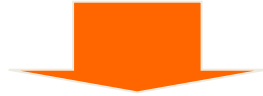

### Annotation

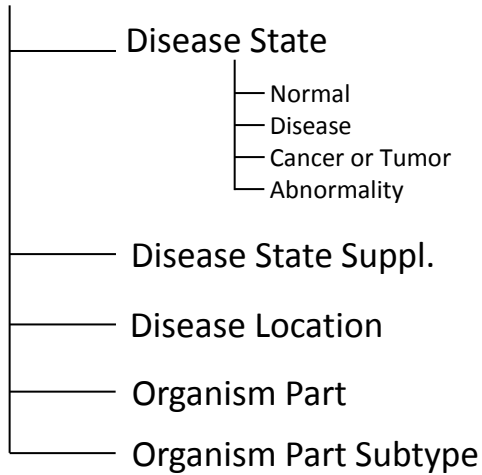

### Quality control

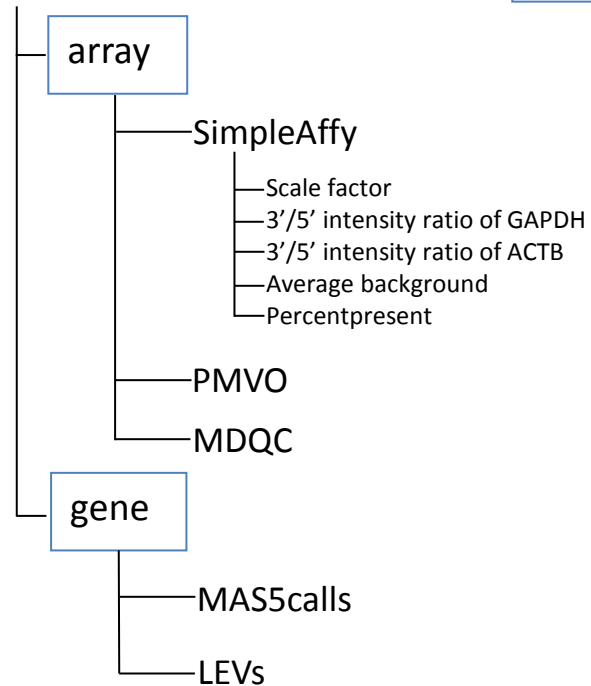

### Data pre-processing

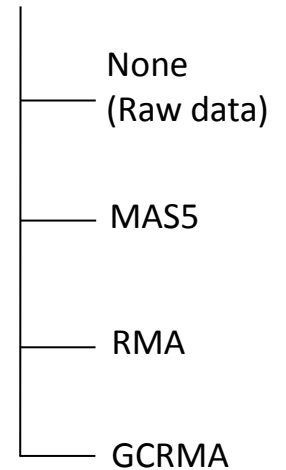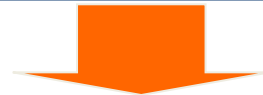

M<sup>2</sup>DB
