# Supplementary material for: Microarray meta-analysis database (M2DB): a uniformly pre-processed, quality controlled, and manually curated human clinical microarray database
Source: Springer Nature journal article supplement (doi:10.1186/1471-2105-11-421), 2010-08-10
Supplement: 12859_2010_3878_MOESM5_ESM.pdf [file 12859_2010_3878_MOESM5_ESM.pdf]

## Part I

# Query Interface

## Part II

**Platform**

- Human U133 A
- Human U133 plus 2.0

**Sample Type**

- Individual Sample
- Pooled Sample

**Quality Control**

None

Simplify

- Scale Factor  $\leq 3$
- Bactin 3/5 ratio  $\leq 3$
- GAPDH 3/5 ratio  $\leq 1.25$

MDQC Score

90    95    99

PMVO Score

90    95    99

**Sample Annotation**

All of samples are re-annotated with five clinical characteristics: "Disease State", "Disease State Suppl.", "Disease Location", "Organism Part", and "Organism Part Subtype". This page helps users to select samples by these five characteristics. Please click **Add Selection Criterion** to define more than one criterion for selection.

**Disease\_State**

**Causes of Tumor (2942)**

**Organism\_Part**

**Causes of Tumor (1433)**

## Experiment/ Sample Information

**Condition**

Platform: Human U133 A, Human U133 plus 2.0

Sample Type: Individual Sample, Pooled Sample

Quality Control: NONE

Sample annotation: Disease\_State: Cancer or Tumor, Organism\_Part: breast

**Experiment**

| Experiment ID | AE Serial Name             | GEO Name                | Investigation Title                                              | Publication Title                                                | Public Release Date | PubMed ID                |
|---------------|----------------------------|-------------------------|------------------------------------------------------------------|------------------------------------------------------------------|---------------------|--------------------------|
| ▶ 43          | <a href="#">E-GEO-1456</a> | <a href="#">GSE1456</a> | Gene expression of breast cancer tissue... <a href="#">more</a>  | Gene expression profiling spares early b... <a href="#">more</a> | 2008/4/22           | <a href="#">16280042</a> |
| ▶ 46          | <a href="#">E-GEO-1561</a> | <a href="#">GSE1561</a> | EORTC 10994 clinical trial                                       | Identification of molecular apocrine bre... <a href="#">more</a> | 2007/8/14           | <a href="#">15897907</a> |
| ▶ 81          | <a href="#">E-GEO-2603</a> | <a href="#">GSE2603</a> | Subpopulations of MDA-MB-231 and Primary... <a href="#">more</a> | Genes that mediate breast cancer metasta... <a href="#">more</a> | 2008/4/23           | <a href="#">16049480</a> |
| ▶ 102         | <a href="#">E-GEO-3494</a> | <a href="#">GSE3494</a> | "An expression signature for p53 in brea... <a href="#">more</a> | "An expression signature for p53 status... <a href="#">more</a>  | 2008/4/4            | <a href="#">16141321</a> |

**Sample Information / QC**

Select All   Unselect All   Records: 20 / Page  

| Sample ID                                | Experiment ID    | Source Name      | Platform ID | Sample Type | Disease State   | Organism Part | Organism Part Subtype | Disease Location | Disease State Suppl                  | MDQC Score | PMVO Score | Scale Factor | Percent Present | Bactin 3/5ratio | GAPDH 3/5ratio | Avg BG |
|------------------------------------------|------------------|------------------|-------------|-------------|-----------------|---------------|-----------------------|------------------|--------------------------------------|------------|------------|--------------|-----------------|-----------------|----------------|--------|
| <input checked="" type="checkbox"/> 2149 | EID: 30; 91; 188 | GSE2990GSM65794  | HG-U133A    | individual  | Cancer or Tumor | breast        | NA                    | breast           | breast cancer                        | 0          | 0          | 1.0          | 44.1            | 1.2             | 1.1            | 96.8   |
| <input checked="" type="checkbox"/> 2153 | EID: 30; 81      | GSE2603GSM50084  | HG-U133A    | individual  | Cancer or Tumor | breast        | NA                    | breast           | breast cancer; Primary Breast Cancer | 0          | 0          | 0.9          | 46.2            | 1.0             | 1.0            | 81.9   |
| <input checked="" type="checkbox"/> 2161 | EID: 30; 91; 188 | GSE2990GSM65813  | HG-U133A    | individual  | Cancer or Tumor | breast        | NA                    | breast           | breast cancer                        | 0          | 0          | 0.6          | 52.3            | 1.1             | 1.0            | 88.5   |
| <input checked="" type="checkbox"/> 2162 | EID: 30; 153     | GSE5847GSM136351 | HG-U133A    | individual  | Cancer or Tumor | breast        | stroma                | breast           | breast cancer                        | 0          | 0          | 0.4          | 54.3            | 1.6             | 1.2            | 77.8   |
| <input checked="" type="checkbox"/> 2175 | EID: 30; 43      | GSE1456GSM107157 | HG-U133A    | individual  | Cancer or Tumor | breast        | NA                    | breast           | breast cancer                        | 0          | 0          | 0.6          | 50.7            | 1.0             | 1.0            | 77.9   |
| <input checked="" type="checkbox"/> 2185 | EID: 30; 136     | GSE4922GSM119961 | HG-U133A    | individual  | Cancer or Tumor | breast        | NA                    | breast           | breast cancer                        | 0          | 0          | 0.5          | 57.2            | 1.1             | 1.0            | 92.0   |

additional selection box

## Data Format and Submission

**Data Format**

Raw Data

Mas5    RMA    GC-RMA

Mas5Call    LEVscore

**Email Address**
